# Supplementary material
Source: PubMed Central journal article supplement (PMC3322377)

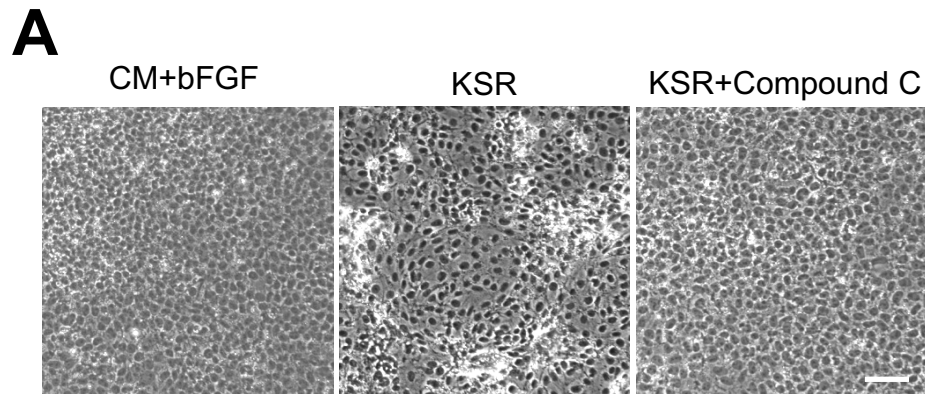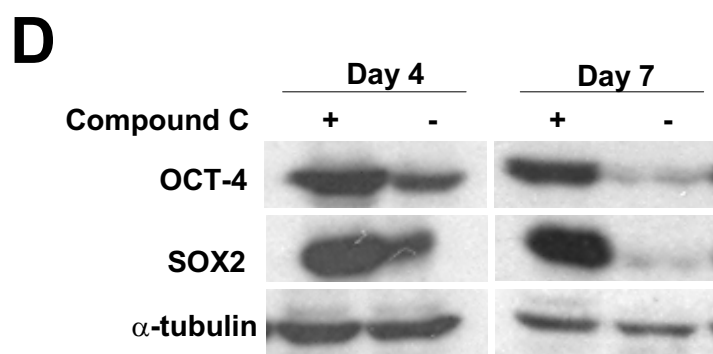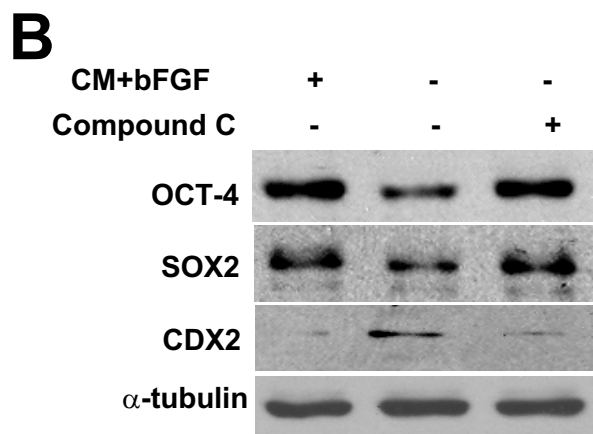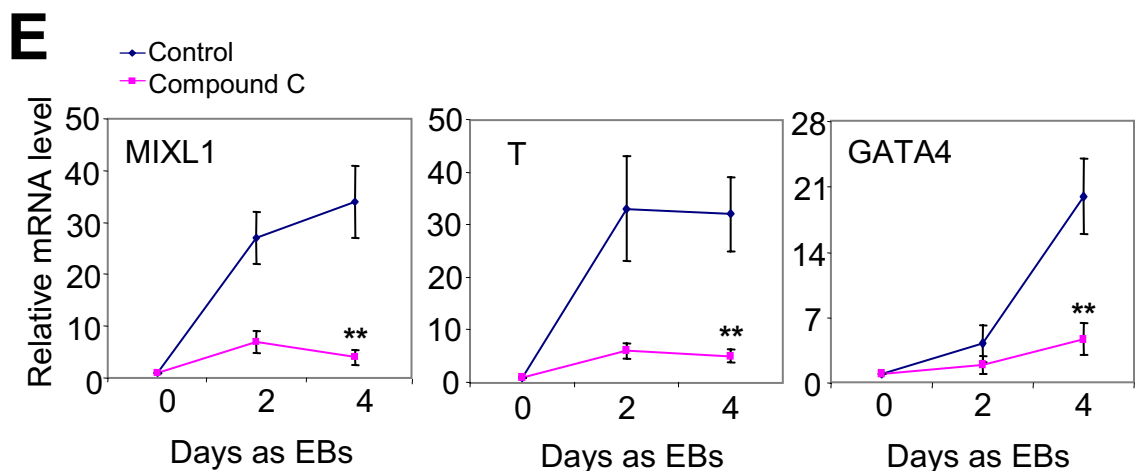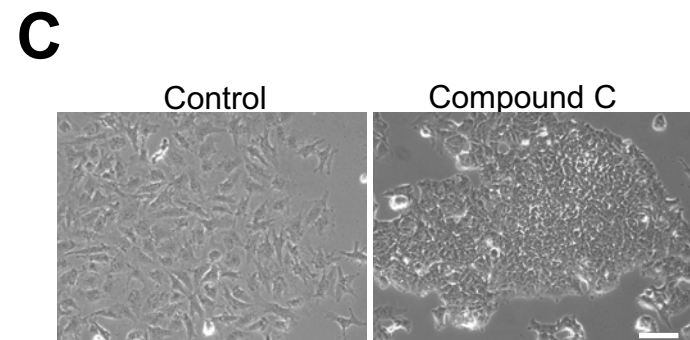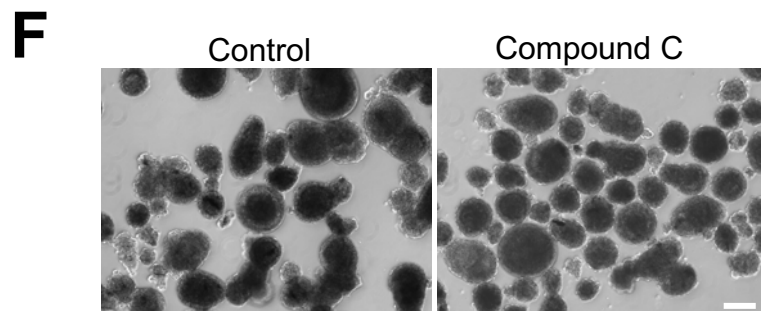

**A**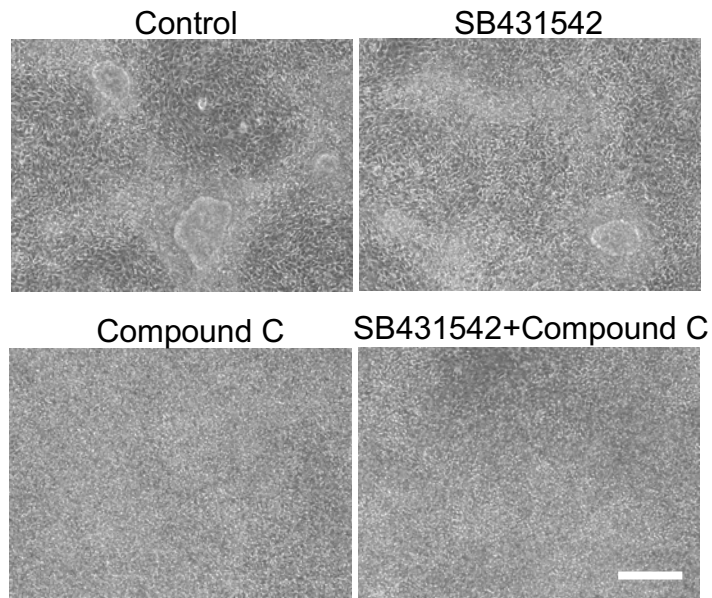**B**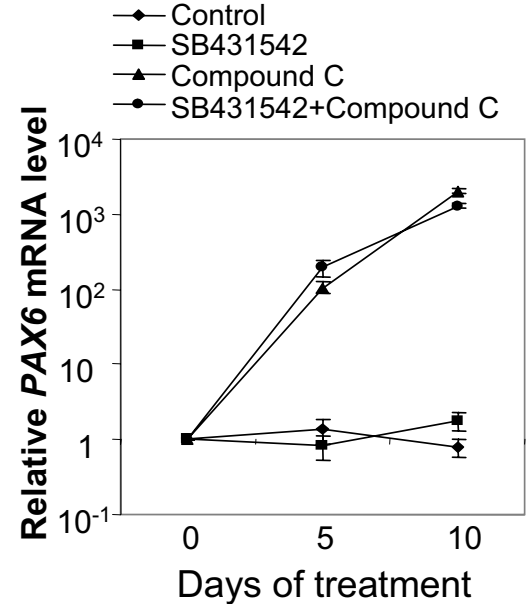**C**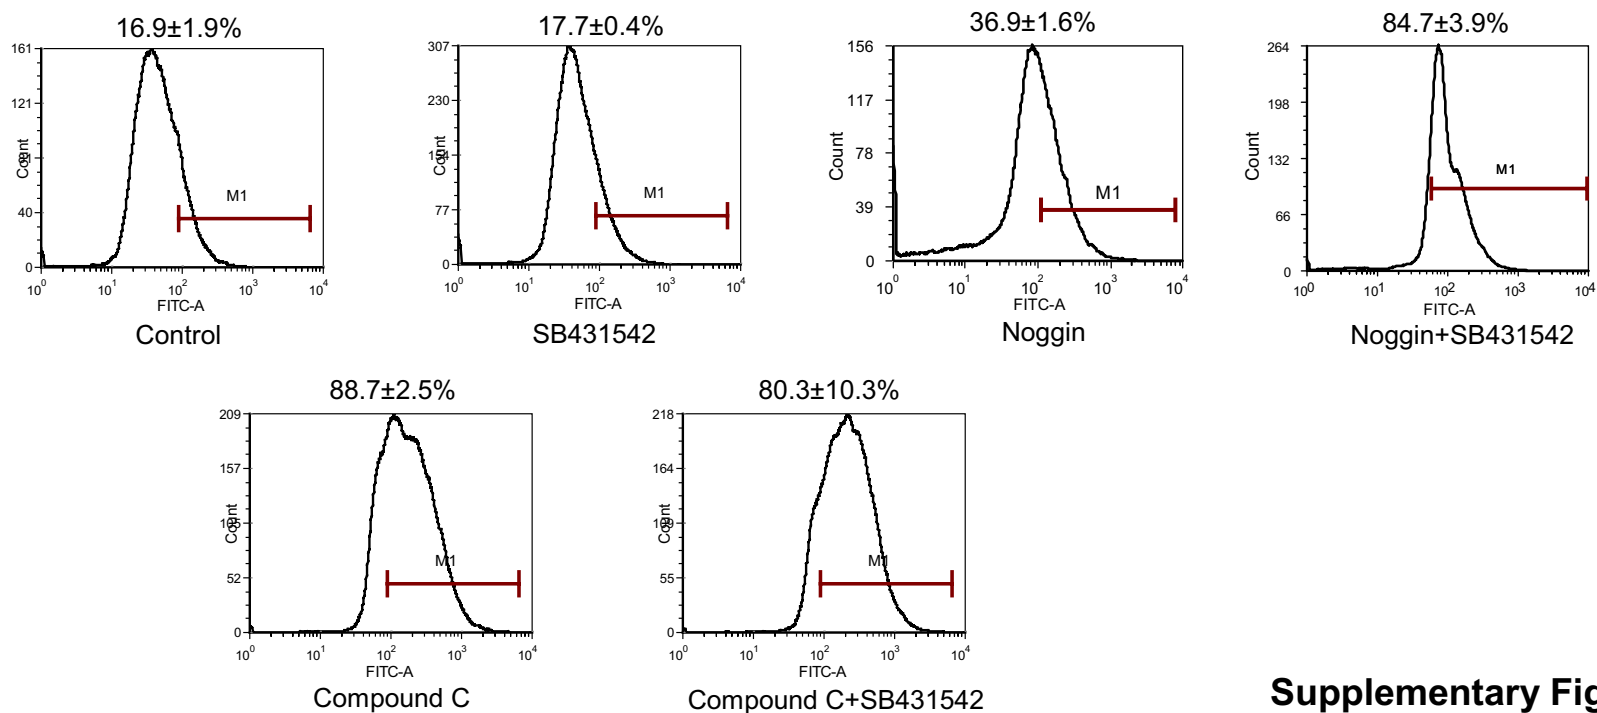

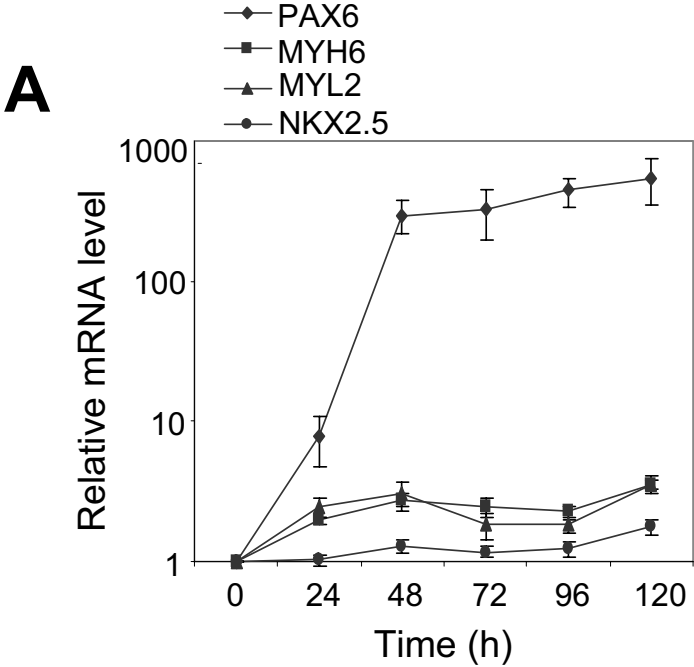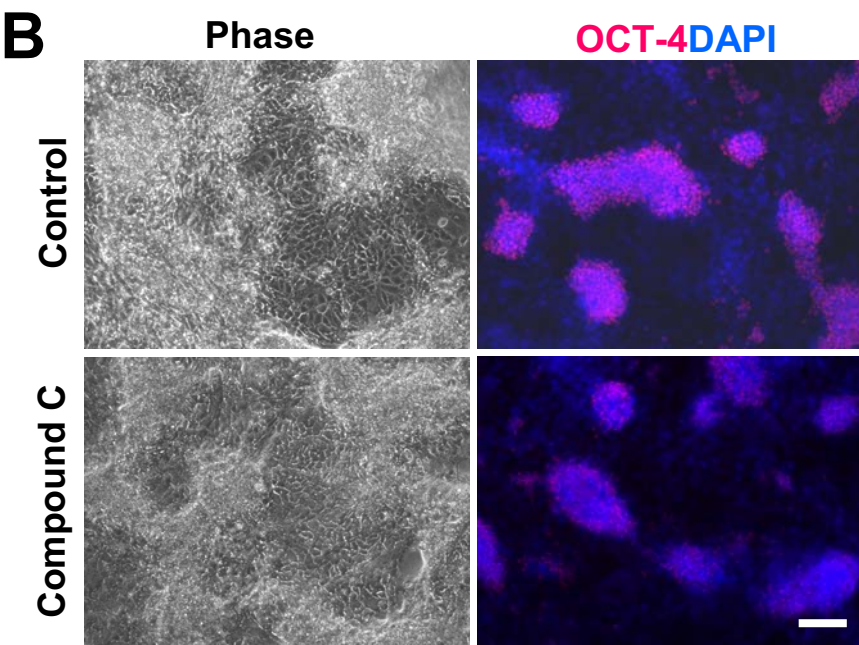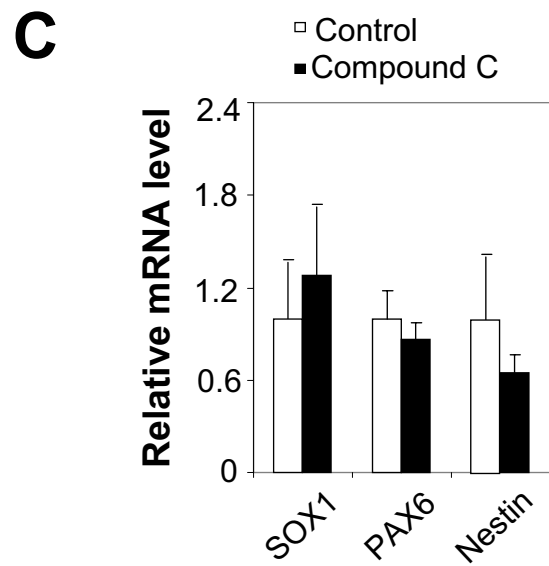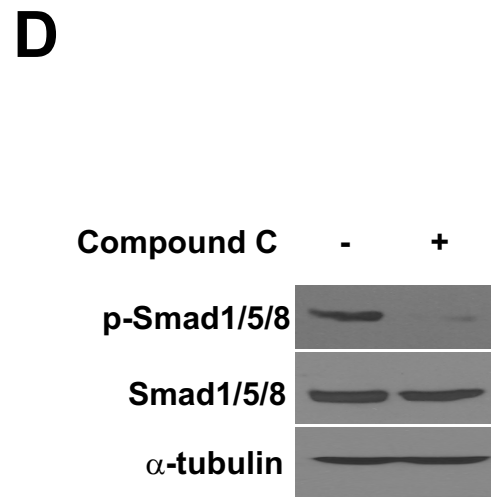

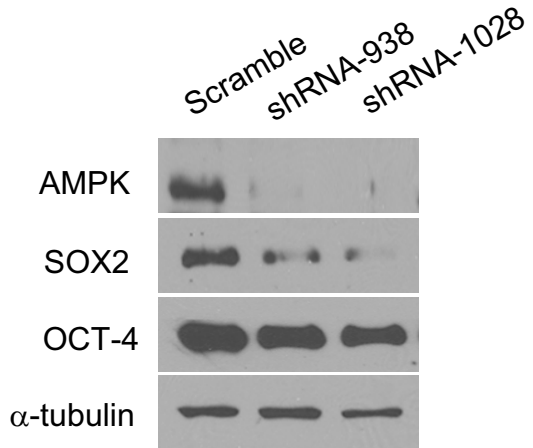

**Supplementary Fig. 4**

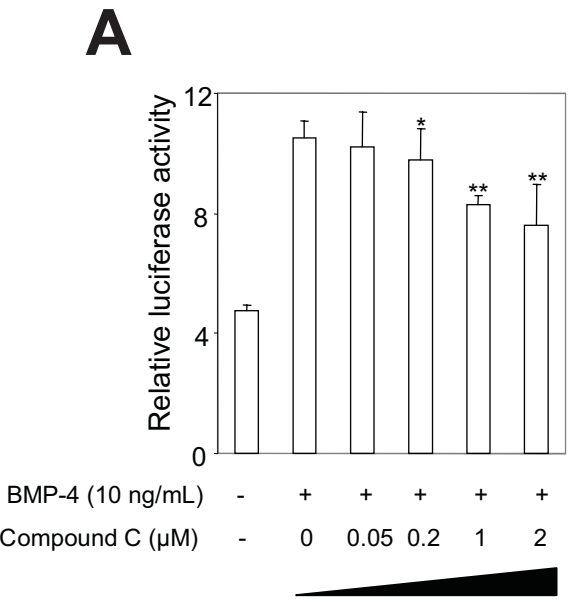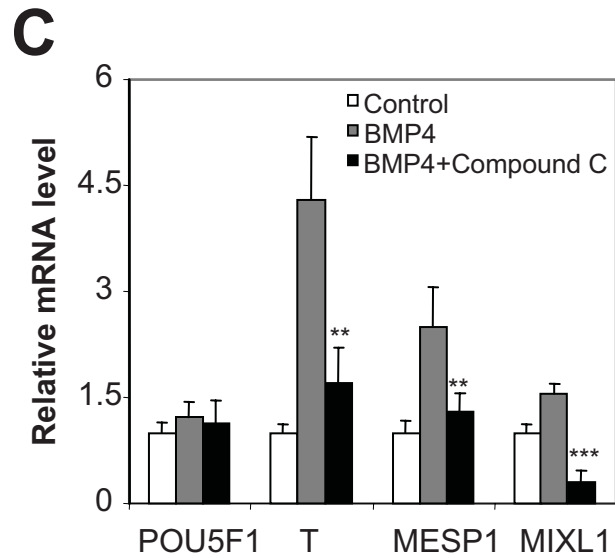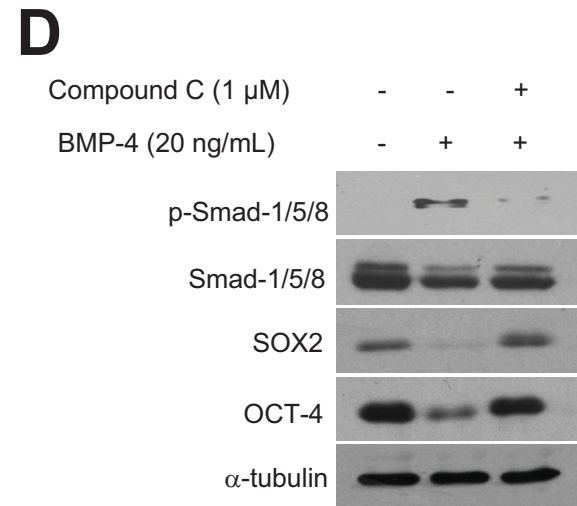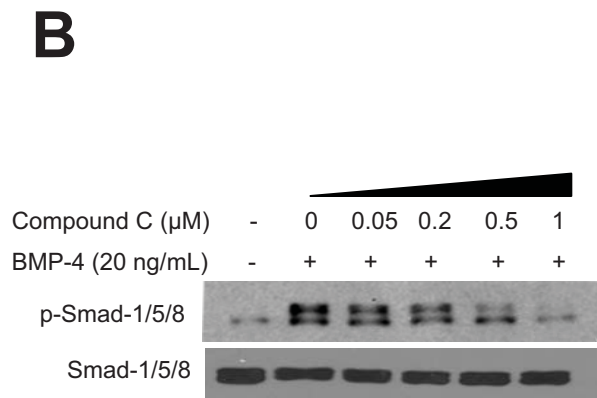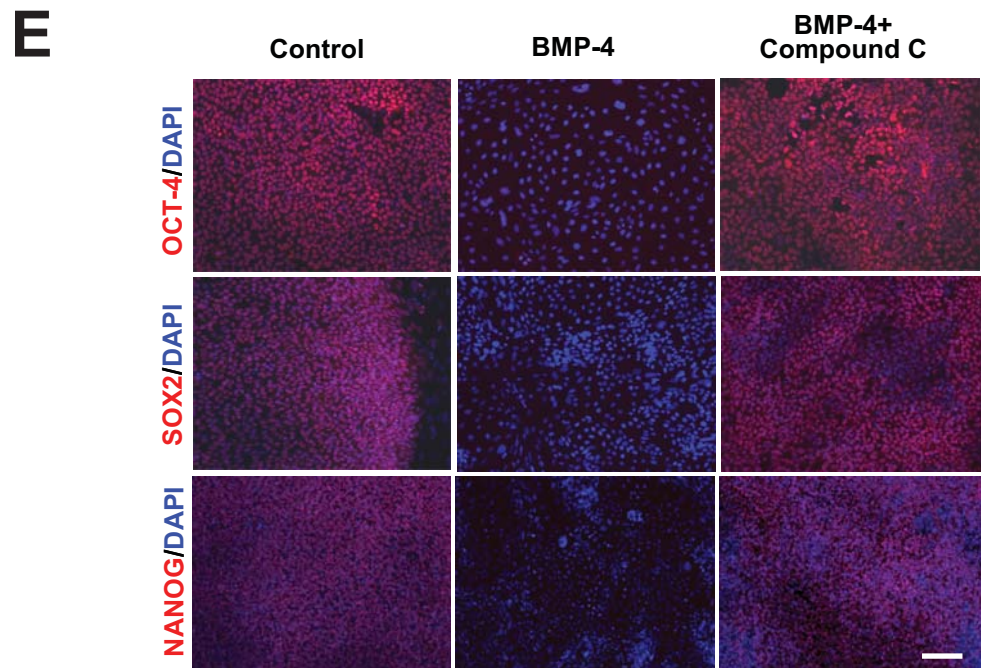

Supplementary Fig. 5

**A**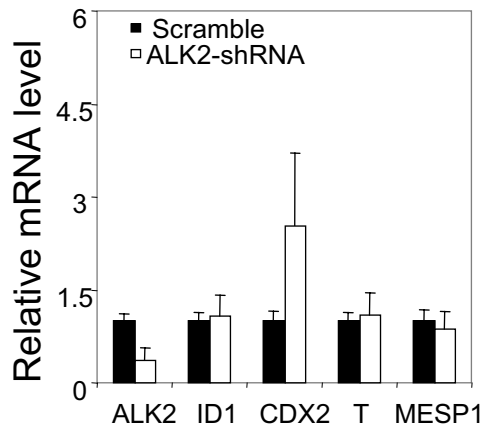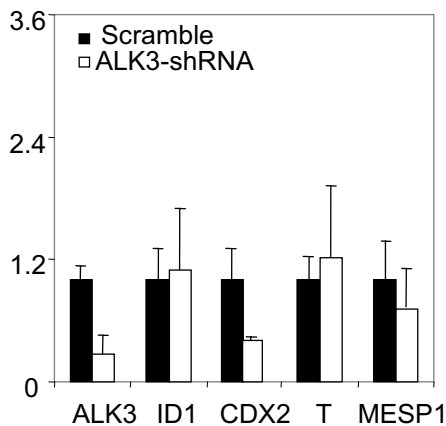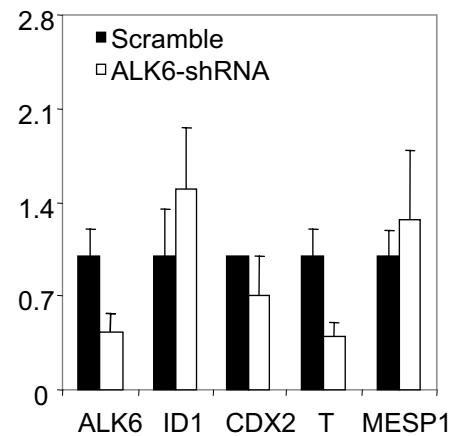**B**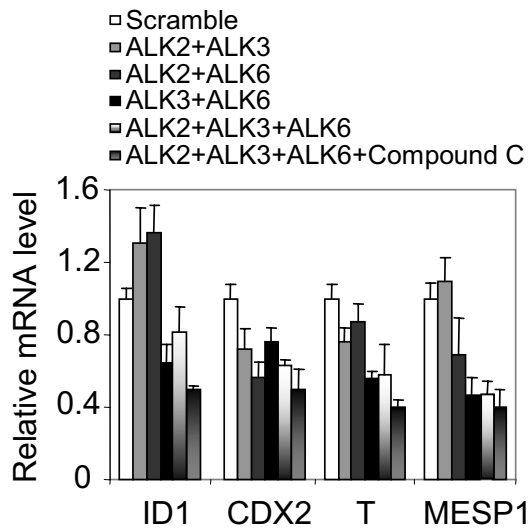**C**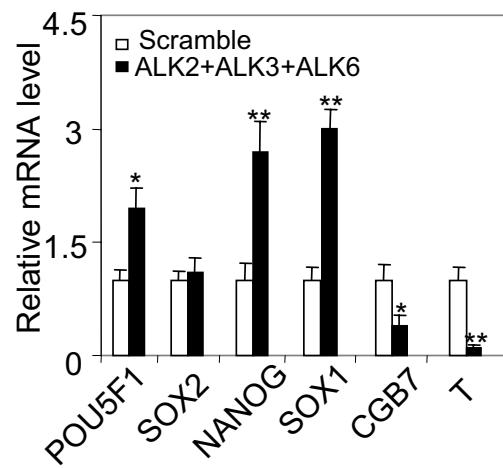

Supplement: NIHMS367087-supplement-Supp_Fig_S1-S6.pdf [file NIHMS367087-supplement-Supp_Fig_S1-S6.pdf]
